# Supplementary material for: Hybrid CMOS circuits with 2D transistors: Projected performance down to sub-1 nm technology nodes
Source: Research Square preprint supplement (doi:10.21203/rs.3.rs-6423846/v1), 2025-05-05
Supplement: Supplementary file 1 [file a02757ff24fe30773022d6a2.docx]

**Hybrid CMOS circuits with 2D transistors: Projected performance down to sub-1 nm technology nodes—Supporting Information**

**Hengbin Ding1†, Peigen Zhang1†, Fumeng Yang1†, Anhan Liu1†, Zhujun Yao1, Jiarui He1, He Tian1***

1School of Integrated Circuits and Beijing National Research Center for Information Science and Technology (BNRist), Tsinghua University, Beijing 100084, China

* Correspondence: [tianhe88@tsinghua.edu.cn](mailto:tianhe88@tsinghua.edu.cn)

**†** These authors contributed equally to this work

**Supplementary data 1. Performance stability verification of MoS2 bottom-gate transistors.**

The transfer characteristics of 50 devices are measured at two different device sizes. The supply voltage (Vdd) is set to both high (1 V) and low (0.05 V) values, with the gate voltage (Vg) scanning from -4 V to 4 V to ensure the devices undergo the complete switching process. It is evident that all three sets of devices exhibit excellent uniformity, with distinct variations in drain current (Id) levels under different Vdd conditions, as expected.


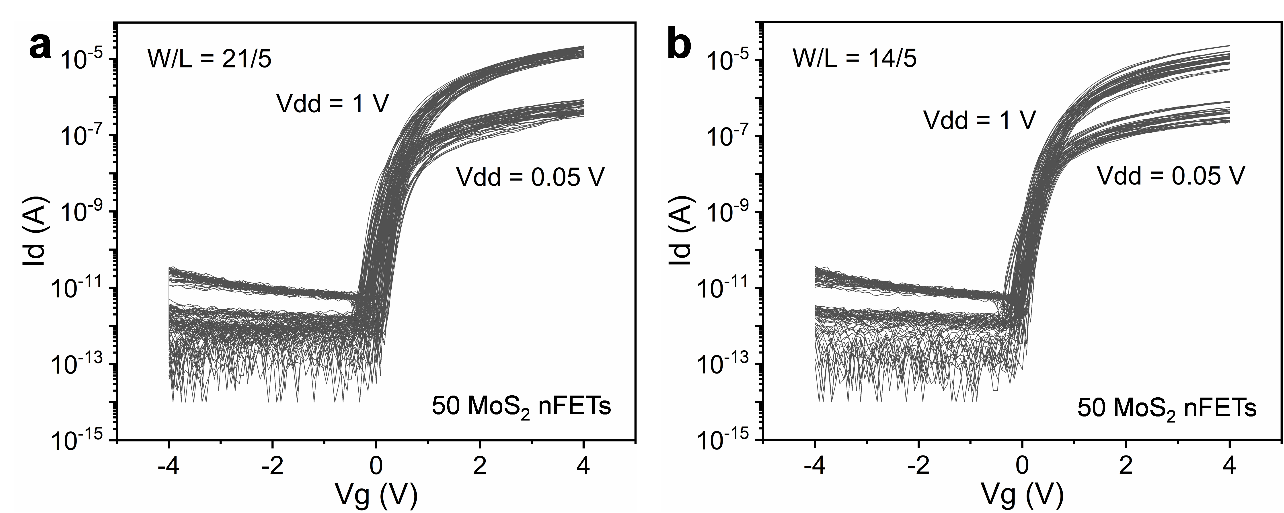


Figure S1. Performance stability verification of MoS2 bottom-gate transistors. The width-to-length ratios (W/L) of the devices are 21/5 (a), 14/5 (b), respectively.

**Supplementary data 2. Parameters and design rules of experimental MoS2 transistors for model calibration.**

Table S1. Parameters and design rules of experimental MoS2 transistors for model calibration and validation.

| Parameter | Bottom-gate MoS2 transistor | | |
| --- | --- | --- | --- |
| Channel width/length (μm) | 21/5 | 14/5 | 4/0.06 |
| Back gate width (μm) | 10 | 10 | 1 |
| Contact CD (μm) | 5 | 5 | 0.47 |
| MoS2 width (μm) | 15 | 15 | 4 |
| S/D and gate overlap (μm) | 2.5 | 2.5 | 0.47 |
| High-k thickness (nm) | 10 | 10 | 10 |
| High-k material | HfOx | HfOx | HfOx |
| Gate material | Pd/Cr | Pd/Cr | Pd/Cr |
| S/D material | Au/Cr | Au/Cr | Pd/Bi |

**Supplementary data 3. Specific parameters of the MoS2 nFET device model.**

Table S2. Model parameters of MoS2 transistor.

| Parameter | MoS2 nFET |
| --- | --- |
| Thickness (nm) | 0.65 |
| Bandgap (eV) | 1.8 |
| Electron affinity (eV) | 4.3 |
| Dielectric constant | 4.1 |
| Nc300 (cm-3) | 2.1e20 |
| Nv300 (cm-3) | 1.2e19 |
| Intrinsic mobility (cm2/V·s) | 200 |
| Tunneling mass (m0) | 0.93 |
| Saturation velocity | 3.4e6 |
| Fermi pinning level (eV) | 4.48 |
| Pinning coefficient | 0.11 |
| Contact resistance (Ω·μm) | 85*1 |
| Gate work function (eV) | 5.1 |
| Gate oxide thickness (nm) | 3.95 |
| Gate oxide dielectric constant | 20 |
| S/D work function (eV) | 4.5/4.22 |
| MoS2/high-k interface charge (cm-2) | 1.5e13 |
| Donor trap energy level (eV) | 0.85*2 |
| Donor trap density (cm-3) | 2e24 |
| Acceptor trap energy level (eV) | 0.85*3 |
| Acceptor trap density (cm-3) | 1.2e18 |
| Trap capture cross-section (cm2) | 1e-14 |

*1 : This is the realizable value of source-drain contact resistance from reference.1[1].

*2 : Distance of defect energy level in the bandgap from valence band.

*3 : Distance of defect energy level in the bandgap from conduction band.

**Supplementary data 4. Comparison of Device-Level Simulation Results for MoS2 nFET and Si nFET at Five Technology Nodes.**

Figure S2 shows a comparison of the device-level simulation results for MoS₂ nFET and Si nFET under the design rules for five technology nodes, including I-V characteristics and C-V characteristics. The threshold voltage (Vt) and supply voltage (Vdd) are set according to the IRDS requirements, and the capacitance measurement frequency is 1 MHz. The Ion and Ioff are extracted from the current data at Vg of 2.0 V and 0.0 V, respectively, and are normalized by the effective width. The gate capacitance (Cgg) is extracted at and is also normalized by the effective width.


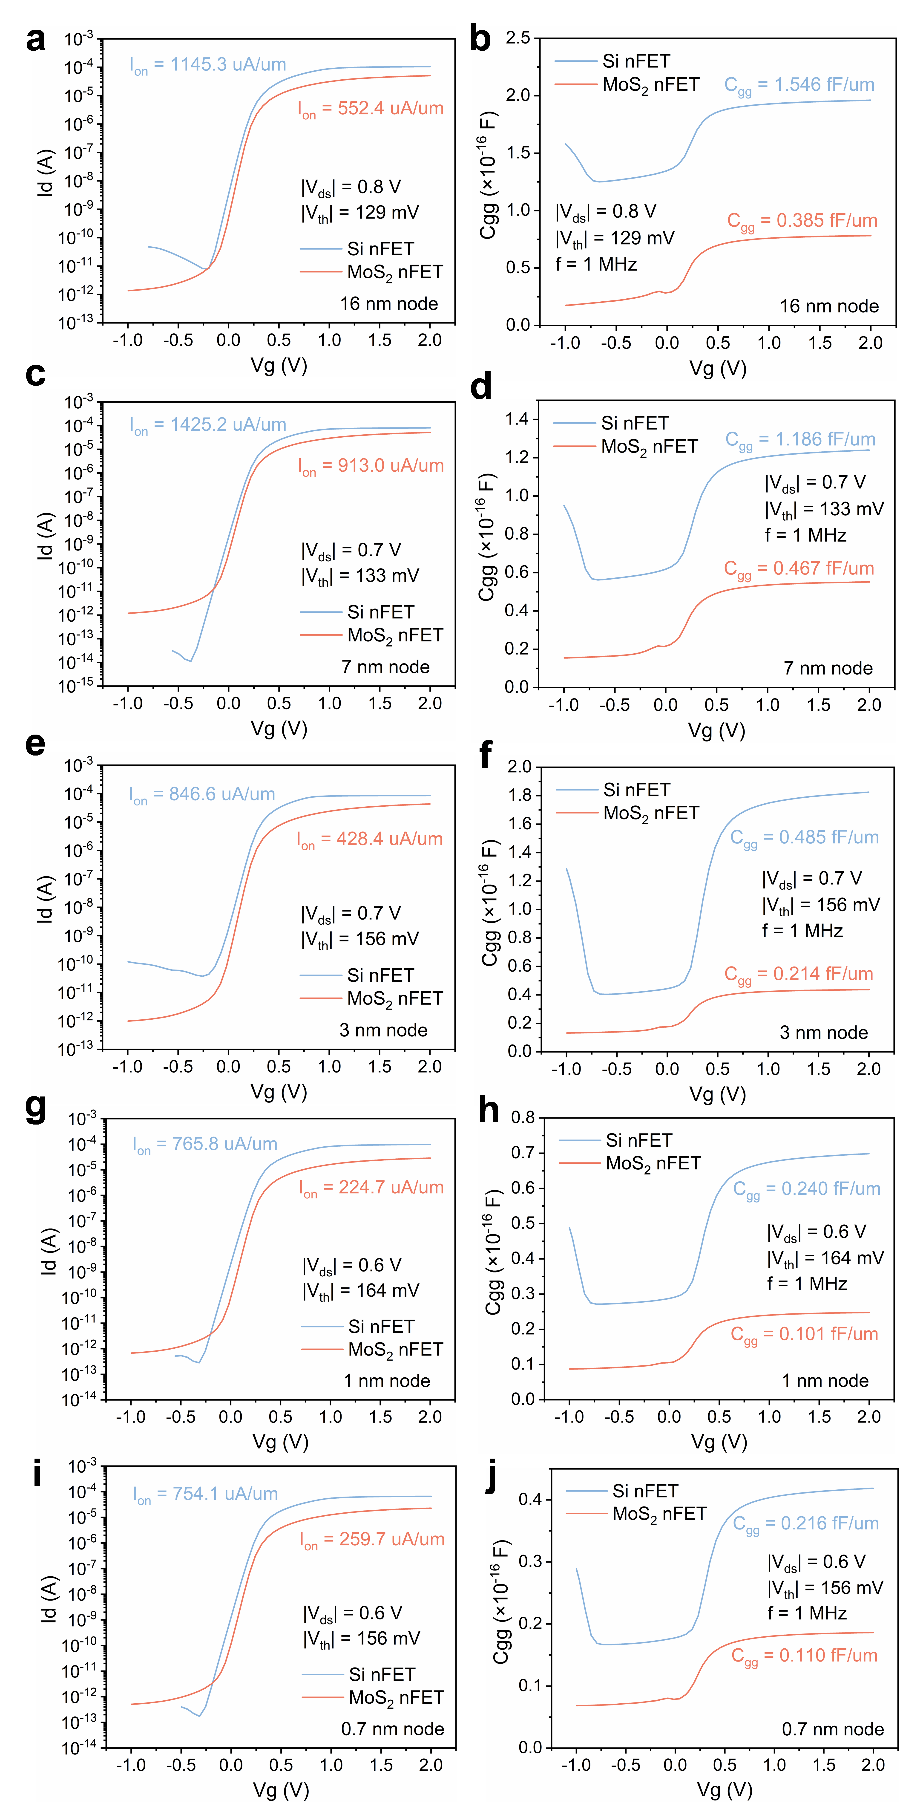


Figure S2. Comparison of device-level simulation results for MoS2 nFET and Si nFET at five technology nodes.

a, b, Comparison of the Id-Vg characteristics (a) and C-V characteristics (b) for MoS2 nFET and Si nFET at the 16 nm node.

c, d, Comparison of the Id-Vg characteristics (c) and C-V characteristics (d) for MoS2 nFET and Si nFET at the 7 nm node.

e, f, Comparison of the Id-Vg characteristics (e) and C-V characteristics (f) for MoS2 nFET and Si nFET at the 3 nm node.

g, h, Comparison of the Id-Vg characteristics (g) and C-V characteristics (h) for MoS2 nFET and Si nFET at the 1 nm node.

i, j, Comparison of the Id-Vg characteristics (i) and C-V characteristics (j) for MoS2 nFET and Si nFET at the 0.7 nm node.

**Supplementary data 5.** **Transfer characteristics of nFET and pFET for MoS2/Si CMOS circuits at five technology nodes.**

Figure S3 shows the transfer characteristics of a Si pFET and a MoS2 nFET. During the construction of the CMOS architecture, the gate work function is adjusted to achieve good |Vt| matching. Based on the comparison of Ion values of device-level, the effective width of the corresponding Si pFET is scaled to match the lower Ion of the MoS2 nFET. It should be noted that the Ion matching can be achieved through two approaches: reducing the Ion of the Si pFET or increasing the Ion of the MoS2 nFET. This involves a trade-off between the gate capacitance and current. When increasing the width of the MoS2 nFET to enhance Ion, it also leads to an increase in gate capacitance and device area, which results in a lower overall improvement in the PPA score. Therefore, this work adopts the approach of reducing the Ion of the Si pFET for CMOS circuit matching. When the advantage of the gate capacitance dominates, the disadvantage of the Ion will be overshadowed.


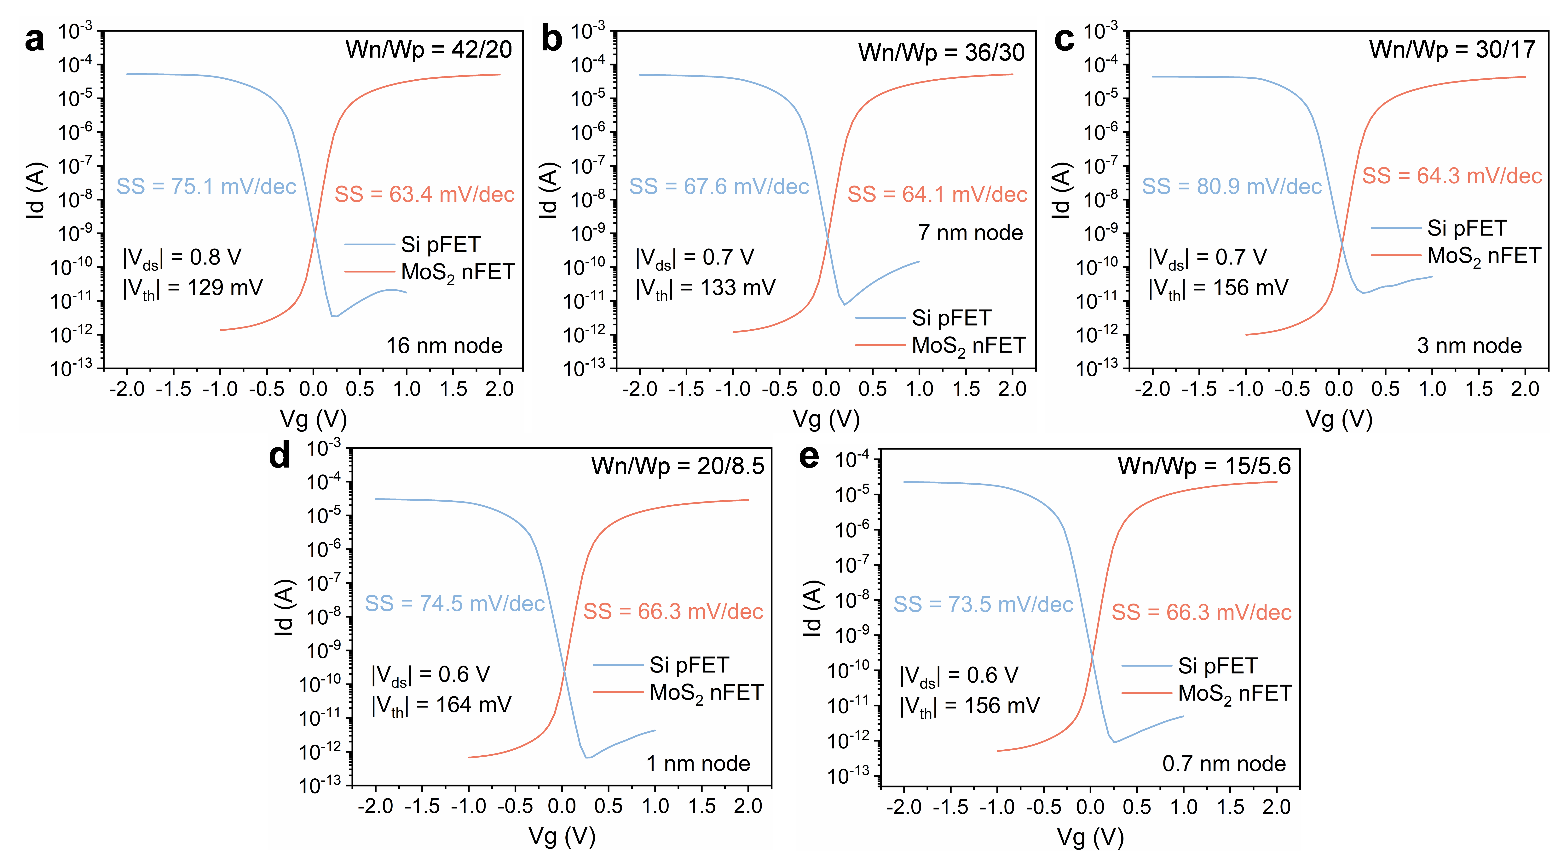


Figure S3. Transfer characteristics of MoS2/Si CMOS circuits for nFET and pFET at five technology nodes.

a, Matching of the MoS2/Si CMOS circuit at the 16 nm node, where the effective width ratio Wn/Wp is 42/20.

b, Matching of the MoS2/Si CMOS circuit at the 7 nm node, where the effective width ratio Wn/Wp is 36/30.

c, Matching of the MoS2/Si CMOS circuit at the 3 nm node, where the effective width ratio Wn/Wp is 30/17.

d, Matching of the MoS2/Si CMOS circuit at the 1 nm node, where the effective width ratio Wn/Wp is 20/8.5.

e, Matching of the MoS2/Si CMOS circuit at the 0.7 nm node, where the effective width ratio Wn/Wp is 15/5.6.

**Supplementary data 6. Summary of interconnect parasitic parameters.**

Table S3. Summary of interconnect parasitic parameters.

| Technology Node (nm) | 16 | 7 | 3 | 1 | 0.7 |
| --- | --- | --- | --- | --- | --- |
| Device Structure | FINFET | FINFET | GAAFET | CFET | CFET |
| Power rail structure | Frontside | Frontside | Frontside | Buried Rail | Buried Rail |
| Cell wireload resistance (Ohms) | 150 | 400 | 512 | 972 | 804 |
| Cell wireload capacitance (fF) | 3.52 | 2.50 | 1.91 | 1.08 | 0.86 |

**Supplementary data 7. CFET deep vias interconnect parasitic reduction**

Figure S4a presents a typical 2D view of a CFET device, with the nFET stacked above the pFET. The introduction of buried power rail technology necessitates deep vias to connect the bottom electrodes to the top electrodes, which leads to significant interconnect parasitic in the CFET architecture. As shown in Figure S4b, replacing the top Si nFET with a MoS2 nFET effectively reduces the interconnect length from the GND electrode to the source of the upper nFET by approximately 50%. Similarly, the interconnect length between the output terminal (Out) and the drain of the lower pFET is also significantly shortened. This is attributed to the ultrathin properties of the 2D material. Therefore, the MoS2/Si hybrid CMOS architecture offers more distinct advantages in interconnects for CFET structures at 1 nm and below nodes.


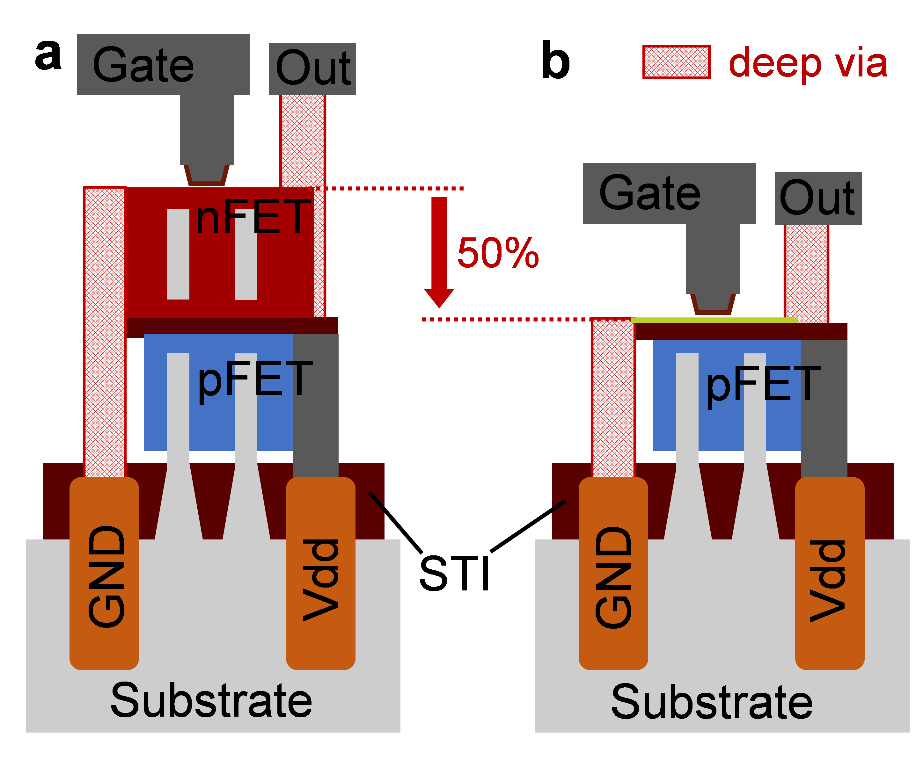


Figure S4. 2D view of Si CFET (a) and MoS2/Si CFET (b) device. Deep vias are needed to access the buried power rail and the top electrodes.

**Supplementary data 8. D-latch circuit interconnect parasitic effects at five technology nodes.**

Figure S5 illustrates the interconnect parasitic effects in Si CMOS architecture and MoS2/Si hybrid CMOS architecture at different technology nodes. It is evident that, compared to Si CMOS circuits, MoS2/Si CMOS circuits can mitigate the negative impact of interconnect to varying extents. This is because the MoS2/Si hybrid CMOS effectively reduce the length of horizontal or vertical interconnect. As shown in Figure S5a, for nodes at 3 nm and above, CMOS architecture adopts a horizontal stacking structure. As previously mentioned, for D-latch, MoS2/Si CMOS can reduce the nFET region area by 20% compared to Si CMOS, thereby reducing the M1 interconnect length by approximately 20%. For nodes at 1 nm and below, CMOS architecture adopts a vertical stacking structure. MoS2/Si CMOS can effectively shorten the interconnect length from the top electrode to the bottom electrode, and this advantage is more pronounced compared to the horizontal stacking structure. Therefore, at 1 nm and below nodes, MoS2/Si hybrid CMOS architecture exhibits a greater interconnect delay advantage. Regarding interconnect power, as shown in Figure S5b, the reduction in interconnect length also brings certain benefits.


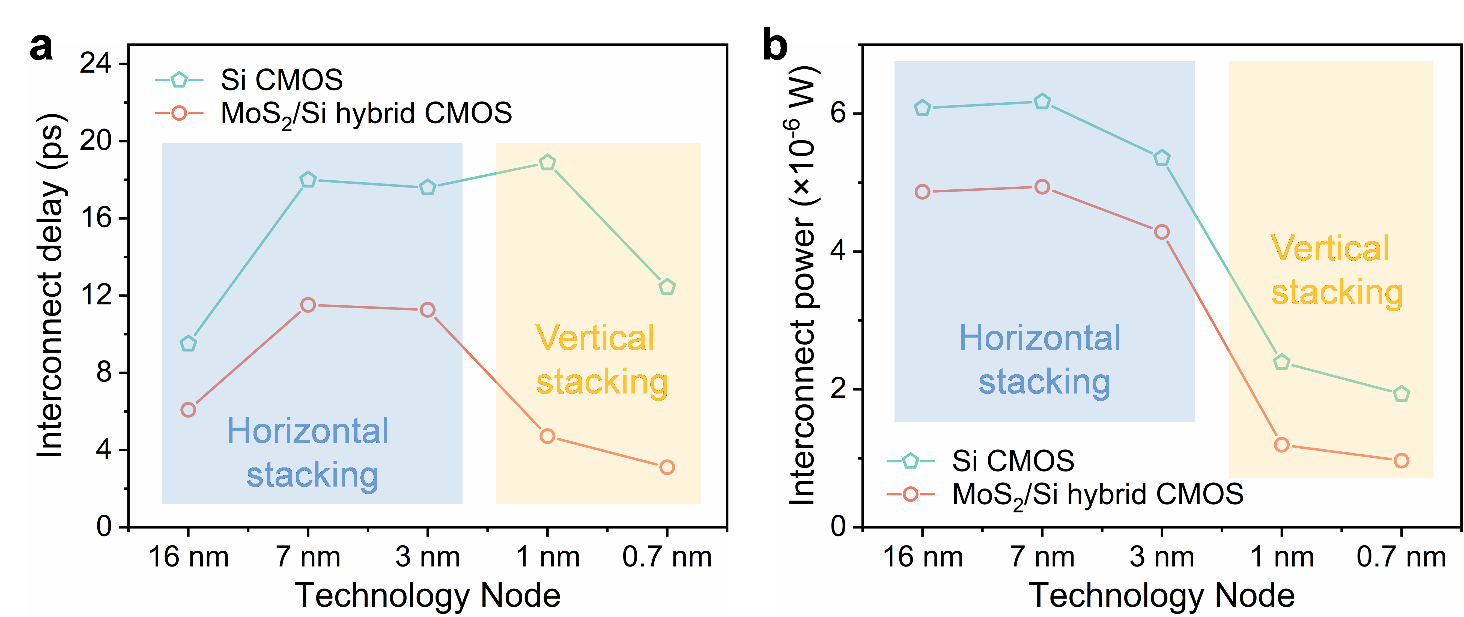


Figure S5. Interconnect parasitic effects of D-latch circuit in Si CMOS architecture and MoS2/Si hybrid CMOS architecture at different technology nodes.

a, Interconnect delay.

b, Interconnect power.

**Supplementary data 9. Specific PPA properties of typical logic gates and circuit modules.**

Table S4. PPA Properties for Si COMS Circuits.

| Circuit cell*1 | 16 nm | | | 7 nm | | | 3 nm | | |
| --- | --- | --- | --- | --- | --- | --- | --- | --- | --- |
| Performance*2 | Power*3 | Area*4 | Performance | Power | Area | Performance | Power | Area |
| nand | 12.675279 | 2.604E-06 | 501 | 10.769586 | 1.998E-06 | 501 | 8.493398 | 2.164E-06 | 501 |
| nor | 14.207791 | 2.37E-06 | 501 | 11.74222 | 1.882E-06 | 501 | 9.351339 | 1.962E-06 | 501 |
| and | 22.079833 | 4.137E-06 | 627 | 18.31698 | 3.060E-06 | 627 | 14.970612 | 3.374E-06 | 627 |
| or | 23.591495 | 3.813E-06 | 627 | 19.357025 | 2.952E-06 | 627 | 15.801055 | 3.173E-06 | 627 |
| xor | 24.099143 | 7.886E-06 | 867 | 23.462251 | 6.019E-06 | 867 | 20.268538 | 6.607E-06 | 867 |
| xnor | 25.081654 | 7.848E-06 | 867 | 24.127781 | 5.998E-06 | 867 | 20.770786 | 6.562E-06 | 867 |
| dlatch | 47.315734 | 9.669E-06 | 1701 | 44.076229 | 8.123E-06 | 1701 | 37.286239 | 8.408E-06 | 1701 |
| Fadder | 100.372685 | 2.53E-05 | 2073 | 92.153537 | 2.002E-05 | 2073 | 80.338505 | 2.116E-05 | 2073 |

*1 : Typical digital circuit cells.

*2 :Express as delay, the unit is picoseconds (ps).

*3 : The unit is watt (W).

*4 : The unit is λ2. The λ is the gate length of the corresponding node.

Table S4 continued. PPA Properties for Si CMOS Circuits.

| Circuit cell*1 | 1 nm | | | 0.7 nm | | | |
| --- | --- | --- | --- | --- | --- | --- | --- |
| Performance*2 | Power*3 | Area*4 | Performance | Power | Area |
| nand | 7.29631 | 9.143E-07 | 250.5 | 5.575544 | 6.713E-07 | 250.5 |
| nor | 7.845157 | 8.460E-07 | 250.5 | 6.105285 | 6.292E-07 | 250.5 |
| and | 11.672036 | 1.403E-06 | 313.5 | 9.010575 | 1.025E-06 | 313.5 |
| or | 12.191725 | 1.336E-06 | 313.5 | 9.539276 | 9.843E-07 | 313.5 |
| xor | 17.66789 | 2.745E-06 | 433.5 | 12.882863 | 2.018E-06 | 433.5 |
| xnor | 17.877913 | 2.727E-06 | 433.5 | 13.055735 | 2.005E-06 | 433.5 |
| dlatch | 29.508114 | 3.624E-06 | 850.5 | 21.941999 | 2.706E-06 | 850.5 |
| Fadder | 63.609831 | 9.010E-06 | 1036.5 | 46.540748 | 6.849E-06 | 1036.5 |

*1 : Typical digital circuit cells.

*2 :Express as delay, the unit is picoseconds (ps).

*3 : The unit is watt (W).

*4 : The unit is λ2. The λ is the gate length of the corresponding node.

Table S5. PPA Properties for MoS2/Si hybrid CMOS Circuits.

| Circuit cell*1 | 16 nm | | | 7 nm | | | 3 nm | | |
| --- | --- | --- | --- | --- | --- | --- | --- | --- | --- |
| Performance*2 | Power*3 | Area*4 | Performance | Power | Area | Performance | Power | Area |
| nand | 10.03827 | 1.524E-06 | 375.75 | 8.664103 | 1.367E-06 | 375.75 | 7.401941 | 1.360E-06 | 375.75 |
| nor | 11.69081 | 1.433E-06 | 375.75 | 9.770859 | 1.300E-06 | 375.75 | 8.492468 | 1.265E-06 | 375.75 |
| and | 17.74792 | 2.340E-06 | 470.25 | 14.88736 | 2.056E-06 | 470.25 | 12.83964 | 2.039E-06 | 470.25 |
| or | 19.7317 | 2.222E-06 | 470.25 | 16.35065 | 1.993E-06 | 470.25 | 14.47806 | 1.945E-06 | 470.25 |
| xor | 17.93133 | 4.555E-06 | 650.25 | 17.095 | 4.063E-06 | 650.25 | 15.21418 | 4.032E-06 | 650.25 |
| xnor | 19.5863 | 4.309E-06 | 650.25 | 17.81193 | 4.060E-06 | 650.25 | 15.90768 | 4.034E-06 | 650.25 |
| dlatch | 35.68588 | 5.972E-06 | 1360.8 | 33.03421 | 5.628E-06 | 1360.8 | 28.96288 | 5.335E-06 | 1360.8 |
| Fadder | 75.48518 | 1.511E-05 | 1762.05 | 68.26149 | 1.376E-05 | 1762.05 | 61.79208 | 1.279E-05 | 1762.05 |

*1 : Typical digital circuit cells.

*2 :Express as delay, the unit is picoseconds (ps).

*3 : The unit is watt (W).

*4 : The unit is λ2. The λ is the gate length of the corresponding node.

Table S5 continued. PPA Properties for MoS2/Si hybrid CMOS Circuits.

| Circuit cell*1 | 1 nm | | | 0.7 nm | | |
| --- | --- | --- | --- | --- | --- | --- |
| Performance*2 | Power*3 | Area*4 | Performance | Power | Area |
| nand | 6.5606 | 3.882E-07 | 250.5 | 5.731749 | 3.010E-07 | 250.5 |
| nor | 7.001623 | 3.680E-07 | 250.5 | 6.209416 | 2.873E-07 | 250.5 |
| and | 10.79273 | 5.919E-07 | 313.5 | 9.515387 | 4.598E-07 | 313.5 |
| or | 11.34837 | 5.707E-07 | 313.5 | 10.1321 | 4.455E-07 | 313.5 |
| xor | 11.3873 | 1.179E-06 | 433.5 | 9.671623 | 9.172E-07 | 433.5 |
| xnor | 11.805 | 1.181E-06 | 433.5 | 10.03542 | 9.195E-07 | 433.5 |
| dlatch | 22.04908 | 1.601E-06 | 850.5 | 19.00794 | 1.256E-06 | 850.5 |
| Fadder | 43.08565 | 3.852E-06 | 1036.5 | 36.64311 | 3.041E-06 | 1036.5 |

*1 : Typical digital circuit cells.

*2 :Express as delay, the unit is picoseconds (ps).

*3 : The unit is watt (W).

*4 : The unit is λ2. The λ is the gate length of the corresponding node.

**Supplementary data 10. Schematic and layout optimization of typical logic gates and Full adder circuit.**

As shown in Figure S6a-f, for logic gate circuits, the junction less nature of MoS2 devices is more conducive to layout optimization, yielding an area reduction of about 25%. As the circuit complexity increases, as in the full adder circuit of Figure S6g, this reduction is diminished to 15%. It should be noted that, for more complex modules, MoS2 devices still provide more possibilities for circuit area reduction due to the absence of a fixed n-well regions.


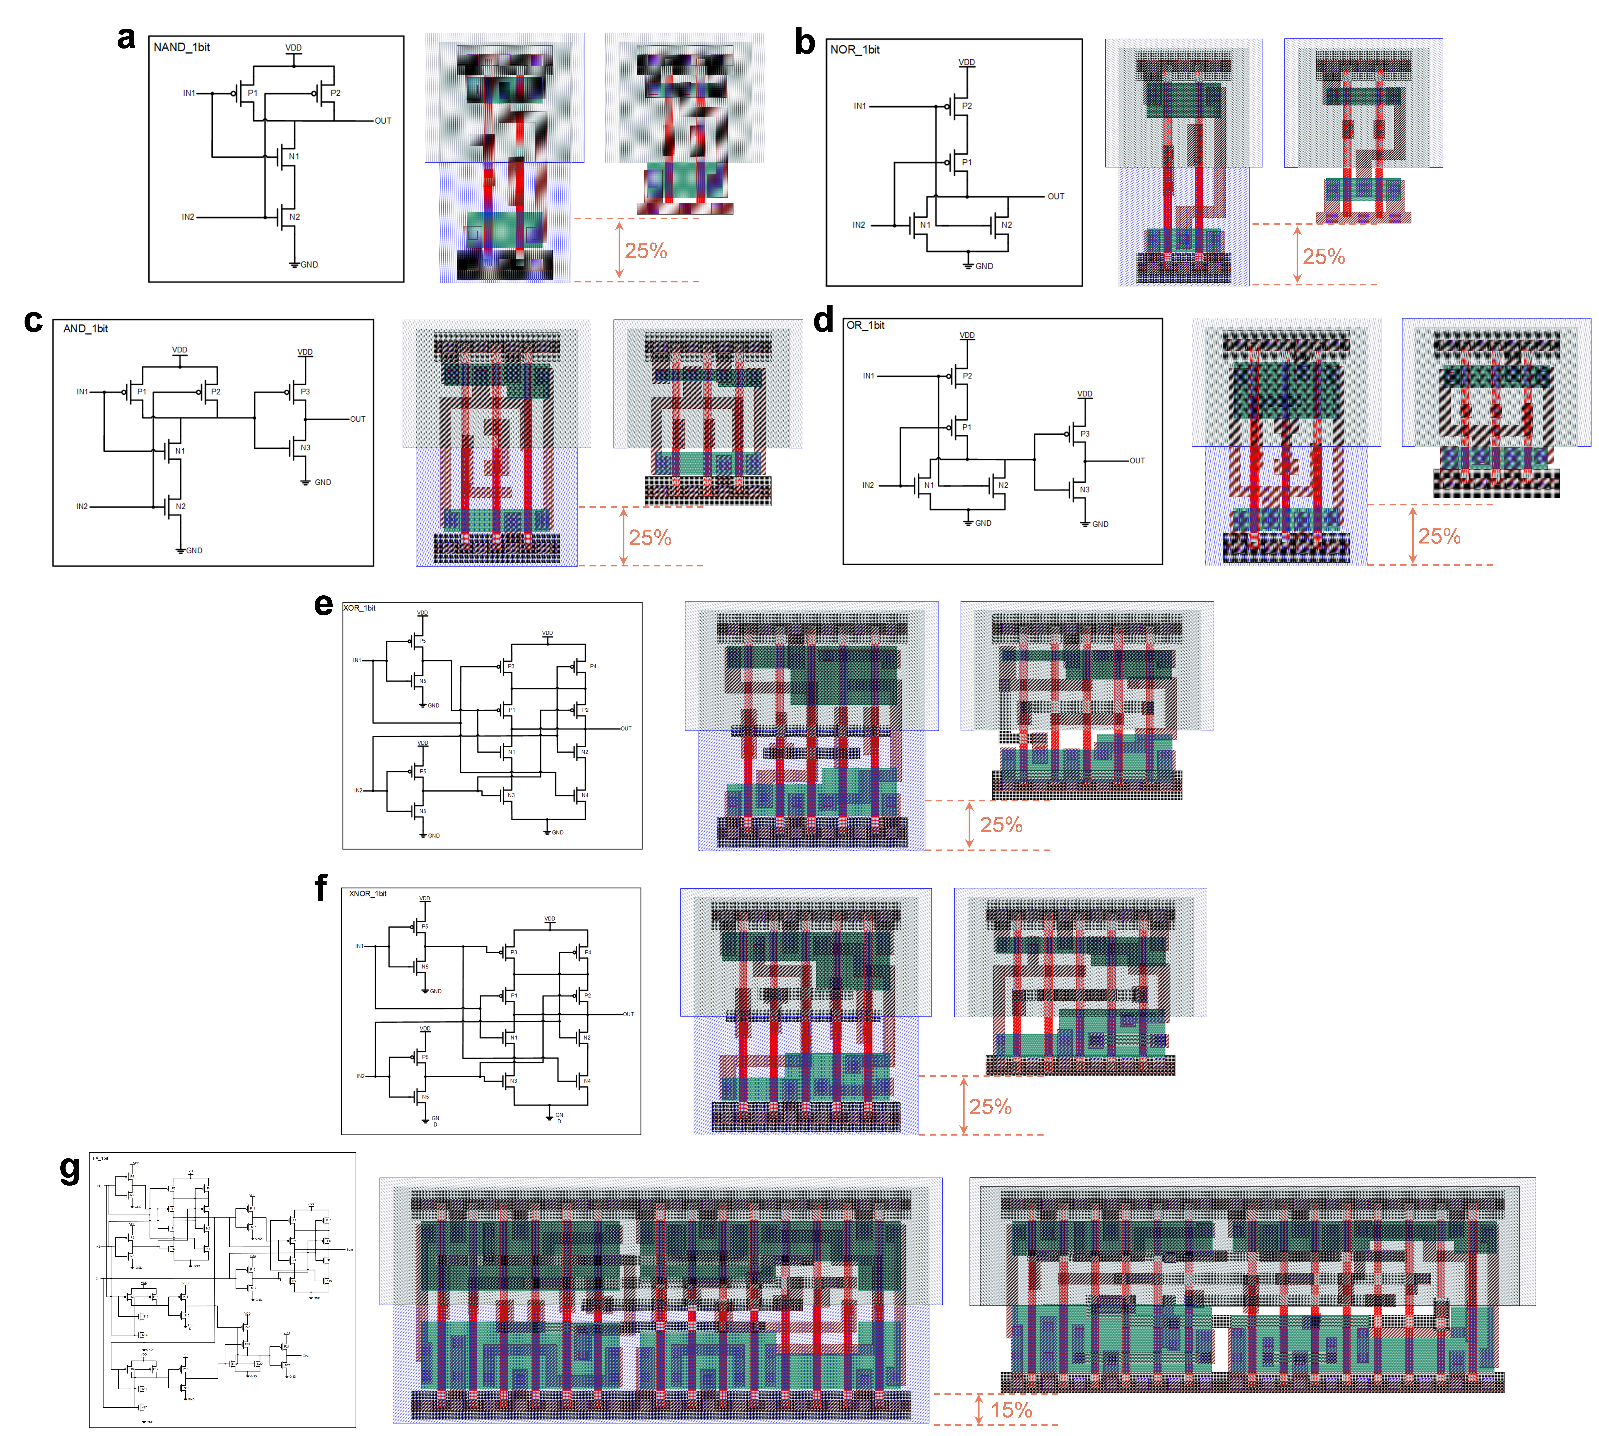


Figure S6. Schematic and layout optimization of typical logic gates and Full adder circuit.

a-f, Logic gates for nand (a), nor (b), and (c), or (d), xor (e) and xnor (f).

g, Full adder circuit.

**Supplementary data 11. PPA raw value reverse normalized calculation method.**

Since smaller values of delay, power, and area correspond to better performance, this study employs the reverse normalized calculation method for data preprocessing when calculating the weighted PPA score. The three sets of raw data are reverse normalized to the range [0, 1] using the equation (1). This method transforms the minimum raw value to and the maximum raw value ​ to .

(1)

where is the raw value, and is the reverse normalized value. Tables 6 and 7 show the reverse normalized PPA scores for the Si/Si CMOS architecture and MoS2/Si CMOS architecture in the Full-adder circuit for three typical scenarios.

Table S6. Si CMOS architecture reverse normalized PPA score.

| Technology Node (nm) | 16 | 7 | 3 | 1 | 0.7 |
| --- | --- | --- | --- | --- | --- |
| High Performance (HP) | 0.05*1 | 0.124867 | 0.225872 | 0.692489 | 0.87260102 |
| Low Power (LP) | 0.05 | 0.146559 | 0.200253 | 0.723491 | 0.86944751 |
| High Density (HD) | 0.05 | 0.07328 | 0.100127 | 0.861746 | 0.93472376 |

*1 : The default minimum score is 0.05.

Table S7. MoS2/Si CMOS architecture reverse normalized PPA score.

| Technology Node (nm) | 16 | 7 | 3 | 1 | 0.7 |
| --- | --- | --- | --- | --- | --- |
| High Performance (HP) | 0.363293 | 0.428888 | 0.500067 | 0.93205257 | 1 |
| Low Power (LP) | 0.375747 | 0.435544 | 0.495788 | 0.94497863 | 1 |
| High Density (HD) | 0.337873 | 0.367772 | 0.397894 | 0.97248932 | 1 |

**Supplementary data 12. Project source code.**

Specific project source code of device-level simulation and circuit-level simulation are found in the supplementary files.

**References**

[1] LI W, DU M, ZHAO C, et al. Scaling MoS2 Transistors to 1 nm Node; proceedings of the 2024 IEEE International Electron Devices Meeting (IEDM), F 7-11 Dec. 2024, 2024 [C].
